# Supplementary material for: Conversion of Hyperpolarized [1-13C]Pyruvate in Breast Cancer Cells Depends on Their Malignancy, Metabolic Program and Nutrient Microenvironment
Source: MDPI journal article supplement (doi:10.3390/cancers14071845), 2022-04-06
Supplement: s1 [file s1]

# Conversion of Hyperpolarized [1-<sup>13</sup>C]Pyruvate in Breast Cancer Cells Depends on their Malignancy, Metabolic Program and Nutrient Microenvironment

Martin Grashei, Philipp Biechl, Franz Schilling, and Angela M. Otto

## Supplementary Material

### Content:

**Table S1:** Intracellular concentrations of lactate and pyruvate in MCF-7 and MDA-MB231 cells.

**Table S2:** Calculations of LDH<sub>eff</sub>.

**Figure S1:** Example of water fall plots of dynamic hyperpolarized <sup>13</sup>C-MRS spectra.

**Figure S2.** Western blots of protein expression of MCT1 in MCF-7 and MCT4 in MDA-MB231.

**Figure S3.** Intracellular pyruvate and lactate levels in MCF-7 and MDA-MB231 cells in different glucose/glutamine conditions as determined by GC-MS.

**Table S1: Intracellular concentrations of lactate and pyruvate in MCF-7 and MDA-MB231 cells.\*****A. MCF-7**

| combinations |              | ratio      |      |         |         | calculated       |
|--------------|--------------|------------|------|---------|---------|------------------|
| glucose mM   | glutamine mM | lactate mM | dev. | pyr/lac | lac/pyr | pyruvate $\mu$ M |
| 1            | 0.1          | 1.50       | 0.69 | 0.021   | 46.5    | 32.2             |
| 2.5          | 0.1          | 2.90       | 1.25 | 0.015   | 65.8    | 44.0             |
| 1            | 1            | 1.33       | 0.69 | 0.015   | 68.3    | 19.4             |
| 2.5          | 1            | 1.24       | 0.58 | 0.023   | 43.3    | 28.7             |
| 25           | 4            | 9.92       | 7.13 | 0.020   | 48.8    | 203.2            |

**B. MDA-231**

| combinations |              | ratio      |      |         |         | calculated       |
|--------------|--------------|------------|------|---------|---------|------------------|
| glucose mM   | glutamine mM | lactate mM | dev. | pyr/lac | lac/pyr | pyruvate $\mu$ M |
| 1            | 0.1          | 8.36       | 0.93 | 0.0043  | 234.0   | 35.7             |
| 2.5          | 0.1          | 13.06      | 1.07 | 0.0056  | 179.6   | 72.7             |
| 1            | 1            | 5.67       | 0.8  | 0.0045  | 222.1   | 25.5             |
| 2.5          | 1            | 4.29       | 0.46 | 0.0071  | 140.9   | 30.5             |
| 25           | 4            | 12.46      | 1.72 | 0.0027  | 376.3   | 33.1             |

\* Lactate levels per sample were determined using the LDH-based assay (Material and Methods). These were used for calculating intracellular concentrations based on a cellular volume of 2 pL /cell and the cell number in the sample [ $\text{lac}_{\text{LDH}}$ ]. For determining the pyruvate concentrations, the ratio of the relative levels of pyruvate/lactate, as determined by GC-MS relative to norvaline, were multiplied with the respective  $\text{lac}_{\text{LDH}}$  concentrations.

**Table S2: Calculations of effective LDH activities (LDH<sub>eff</sub>)\*****A. MCF-7 cells**

| culture conditions |                 | NAD <sup>+</sup><br>(n=2) |      | NADH<br>(n=2) |      | lactate<br>(n=3) |      | pyruvate<br>(Table S1) | LDH activity<br>(V <sub>max</sub> ) | effective LDH<br>activity<br>(LDH <sub>eff</sub> ) |
|--------------------|-----------------|---------------------------|------|---------------|------|------------------|------|------------------------|-------------------------------------|----------------------------------------------------|
| glucose<br>mM      | glutamine<br>mM | μM                        | dev. | μM            | dev. | mM               | dev. | μM                     | μmol/min/<br>10e6 cells*            | μmol/min/<br>10e6 cells*                           |
| 1                  | 0.1             | 607                       | 73   | 95            | 29   | 1.50             | 0.69 | 32.2                   | 0.175                               | 0.052                                              |
| 2.5                | 0.1             | 771                       | 142  | 143           | 30   | 2.90             | 1.25 | 44.0                   | 0.167                               | 0.054                                              |
| 1                  | 1               | 596                       | 73   | 105           | 15   | 1.33             | 0.69 | 19.4                   | 0.135                               | 0.030                                              |
| 2.5                | 1               | 624                       | 13   | 94            | 8    | 1.24             | 0.58 | 28.7                   | 0.144                               | 0.052                                              |
| 25                 | 4               | 650**                     | 71   | 110**         | 17   | 9.92             | 7.13 | 203.2                  | 0.199                               | 0.114                                              |

**B. MDA-MB231 cells**

| culture conditions |                 | NAD <sup>+</sup><br>(n=2) |      | NADH<br>(n=2) |      | lactate<br>(n=3) |      | pyruvate<br>(Table S1) | LDH activity<br>(V <sub>max</sub> ) | effective LDH<br>activity<br>(LDH <sub>eff</sub> ) |
|--------------------|-----------------|---------------------------|------|---------------|------|------------------|------|------------------------|-------------------------------------|----------------------------------------------------|
| glucose<br>mM      | glutamine<br>mM | μM                        | dev. | μM            | dev. | mM               | dev. | μM                     | μmol/min/<br>10e6 cells*            | μmol/min/<br>10e6 cells*                           |
| 1                  | 0.1             | 452                       | 164  | 2.1           | 1    | 8.36             | 0.93 | 32.1                   | 0.187                               | 0.043                                              |
| 2.5                | 0.1             | 601                       | 68   | 97.2          | 32   | 13.06            | 1.07 | 65.7                   | 0.119                               | 0.045                                              |
| 1                  | 1               | 519                       | 22   | 23.8          | 7    | 5.67             | 0.80 | 21.2                   | 0.197                               | 0.035                                              |
| 2.5                | 1               | 625                       | 78   | 65.4          | 5    | 4.29             | 0.46 | 27.0                   | nd                                  | nd                                                 |
| 25                 | 4               | 549**                     | 42   | 81**          | 16   | 12.46            | 1.72 | 26.6                   | 0.155                               | 0.034                                              |

\*Values of intracellular substrate concentrations and potential LDH activities (V<sub>max</sub>) were used to calculate the effective LDH activities (LDH<sub>eff</sub>) of cells from MRS measurements. For simplification and calculations using the Michaelis-Mention equation, it was assumed that the K<sub>M</sub> for pyruvate is 100 μM (see Results, Fig. 3 (Goto et al., 2016) and that NADH was already enzyme-bound, pyruvate thus being the rate-limiting component.

\*\* Values of NAD<sup>+</sup> and NADH averaged from respective values which are apparently similar in the different glucose/glutamine conditions

Reference for Table 2:

Goto, T., Sugawara, K., Nakamura, S., Kidokoro, S. I., Wakui, H., & Nunomura, W. (2016). Enzymatic and thermodynamic profiles of a heterotetramer lactate dehydrogenase isozyme in swine. Biochemical and Biophysical Research Communications, 479(4), 860-867. doi:10.1016/j.bbrc.2016.09.118

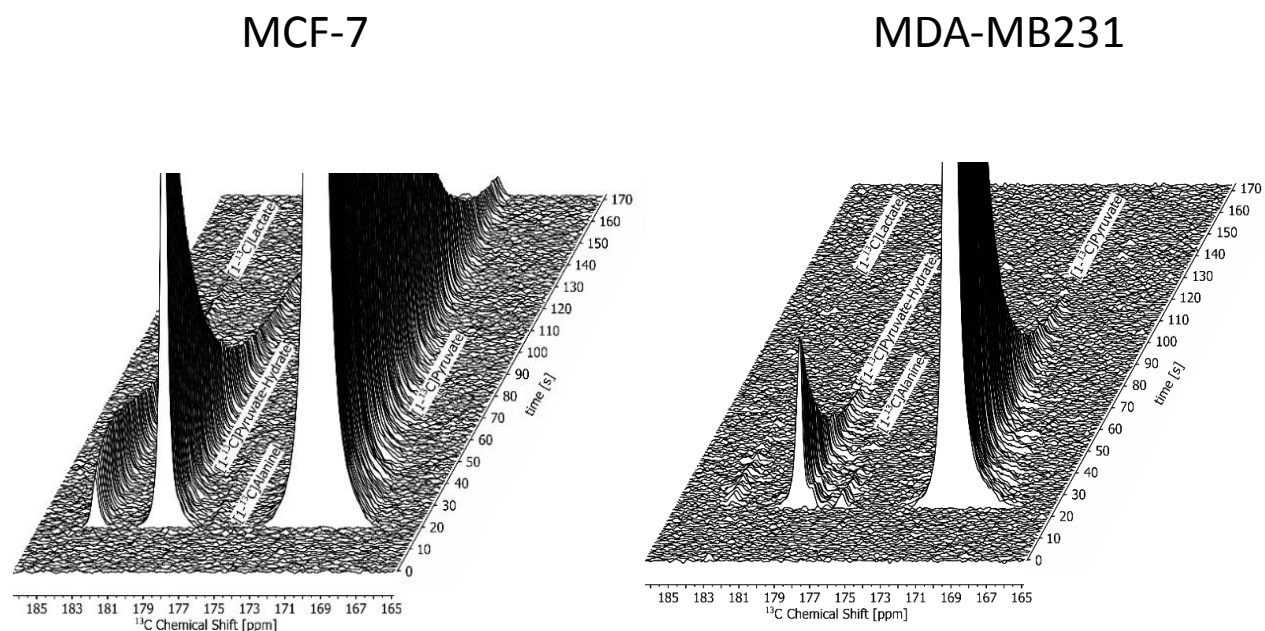

**Figure S1:** Example of water fall plots of dynamic hyperpolarized  $^{13}\text{C}$ -MRS spectra of a 2 min-acquisition upon injection of 1 mM  $[1\text{-}^{13}\text{C}]$  into MCF-7 and MDA-MB231 cell suspensions. Cells had been incubated 72 h in medium containing 2.5 mM glucose and 0.1 mM glutamine.

## MCF-7

|              |                                                                                    |     |     |     |   |   |     |     |        |
|--------------|------------------------------------------------------------------------------------|-----|-----|-----|---|---|-----|-----|--------|
| glucose mM   | 1                                                                                  | 1   | 2.5 | 2.5 | 1 | 1 | 2.5 | 2.5 |        |
| glutamine mM | 0.1                                                                                | 0.1 | 0.1 | 0.1 | 1 | 1 | 1   | 1   |        |
| marker       |                                                                                    |     |     |     |   |   |     |     | marker |
| PK2          |  |     |     |     |   |   |     |     |        |
| MCT1         |  |     |     |     |   |   |     |     |        |

## MDA-MB231

|              |                                                                                    |     |     |     |   |   |    |    |        |
|--------------|------------------------------------------------------------------------------------|-----|-----|-----|---|---|----|----|--------|
| glucose mM   | 1                                                                                  | 1   | 2.5 | 2.5 | 1 | 1 | 25 | 25 |        |
| glutamine mM | 0.1                                                                                | 0.1 | 0.1 | 0.1 | 1 | 1 | 4  | 4  |        |
| marker       |                                                                                    |     |     |     |   |   |    |    | marker |
| PK           |  |     |     |     |   |   |    |    |        |
| MCT1         |  |     |     |     |   |   |    |    |        |
| MCT4         |  |     |     |     |   |   |    |    |        |

**Figure S2.** Western blots of protein expression of MCT1 in MCF-7 and MCT4 in MDA-MB231, relative to pyruvate kinase (as marker) in variable glucose / glutamine conditions.

Shown are representative blots of 2-3 similar experiments for each cell line. The unusual high PK signal in MCF-7 cells may be a technical deviation, as it is not observed in other blots for the same glucose/glutamine conditions.

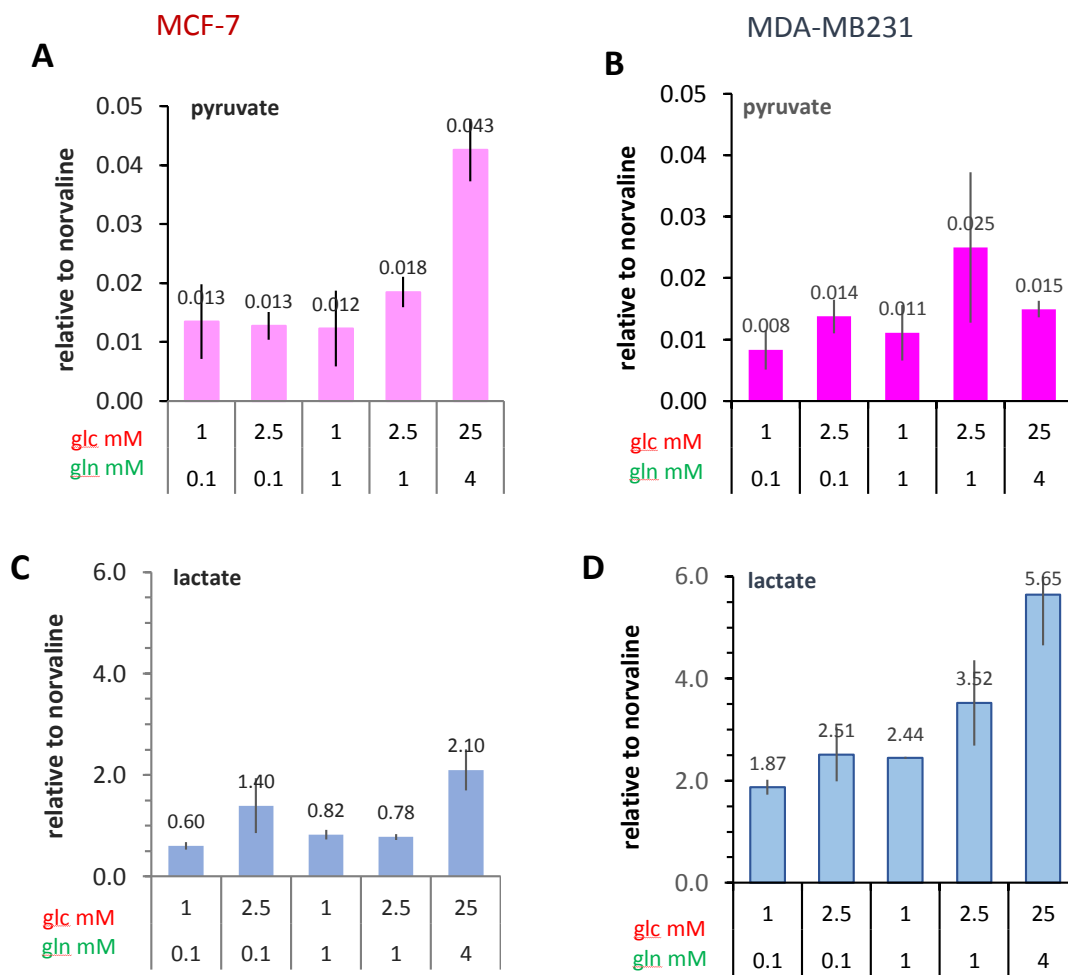

**Figure S3.** Intracellular pyruvate and lactate levels in MCF-7 and MDA-MB231 cells in different glucose/ glutamine conditions as determined by GC-MS.

Cells were incubated for 2 h with medium containing the indicated [U-<sup>13</sup>C<sub>6</sub>]glucose and glutamine concentrations and prepared for metabolite analyses by GC-MS (Material and Methods). Following chromatographic separation, metabolites were quantified relative to the GC-reference compound norvaline. Shown are averages and s.e.m. of two experiments for (A, C) MCF-7 and (B, D) MDA-MB231-MB231
